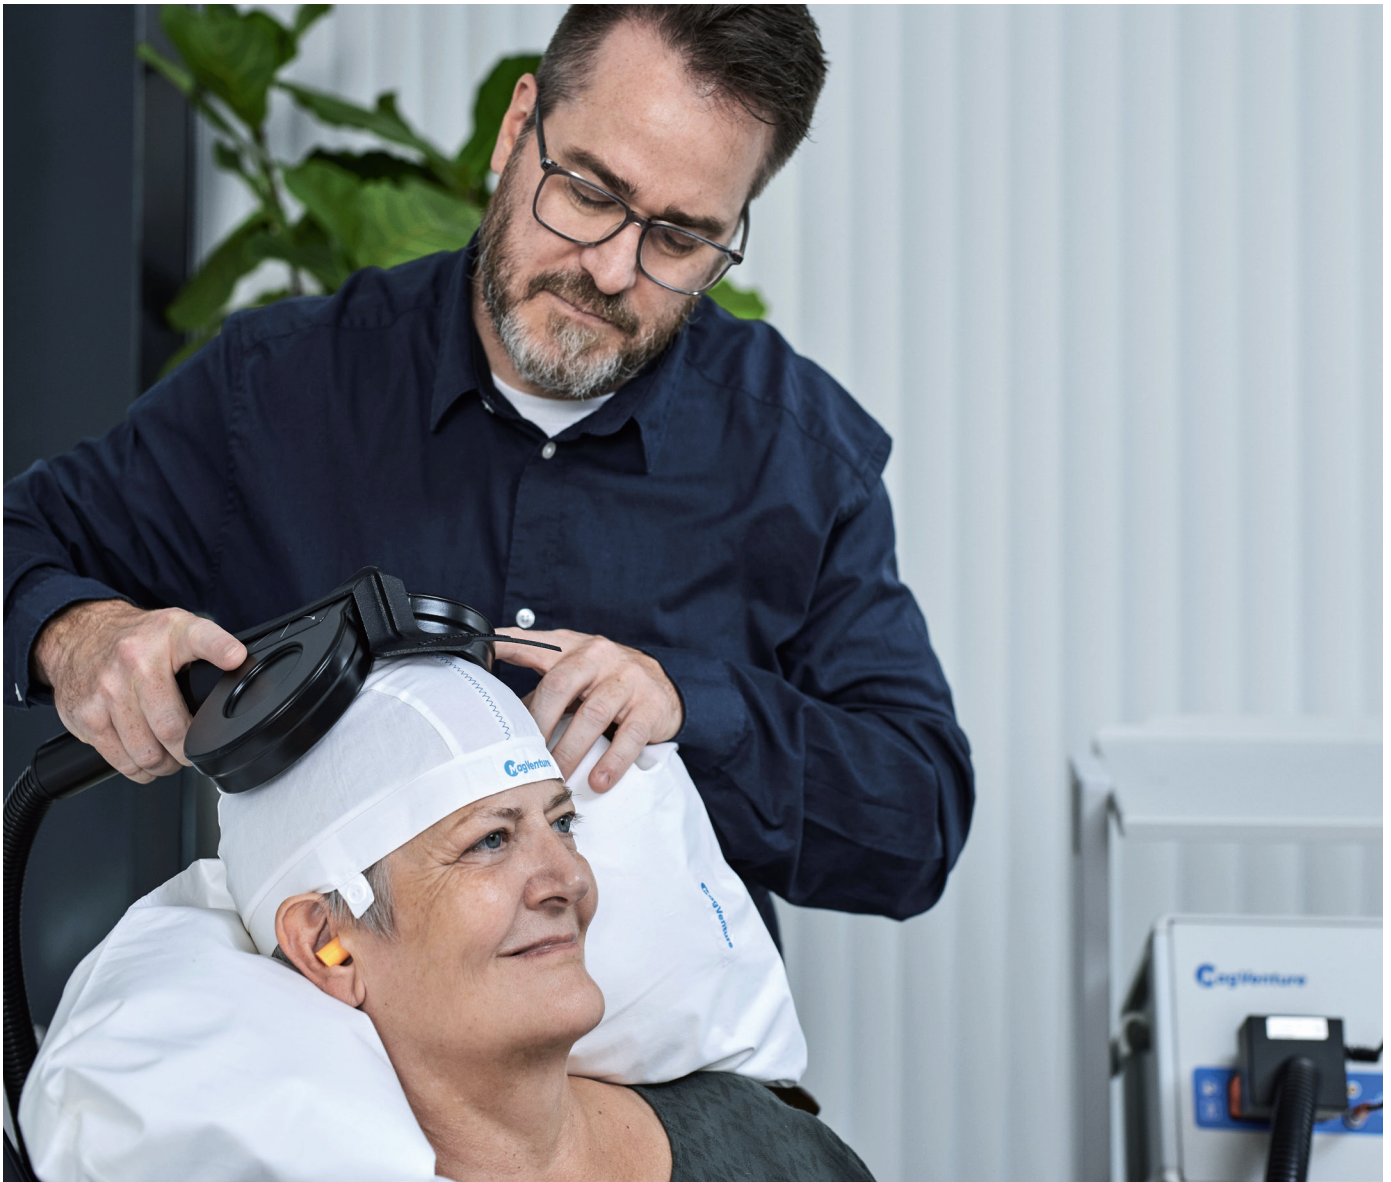

# Considering a Transcranial Magnetic Stimulation System?

MagVenture TMS Therapy™ systems allow the ultimate in flexibility. Our systems are designed to allow you, the practitioner, to utilize TMS the way that is best for your practice. MagVenture systems can support all-day back-to-back treatments with demanding protocols. Enjoy flexible coil positioning to easily reach different targets for depression and OCD and the MagVenture TMS Atlas™ Neuro Navigation system, to facilitate and simplify consistent, accurate placement every time.

**Build your system over time; see the return on investment now.**  
[Magventure.com/package-builder](https://magventure.com/package-builder)

Talk to a MagVenture representative today and find out why there are more MagVenture systems installed globally than any other manufacturer.\*

\*Internal data on file

[www.magventure.com](https://www.magventure.com)

5010-1581 | July 2023 © MagVenture

**MagVenture**
