# The American Journal of Psychiatry

## Shared and Distinct Genetics

A. Schizophrenia and Smoking Initiation

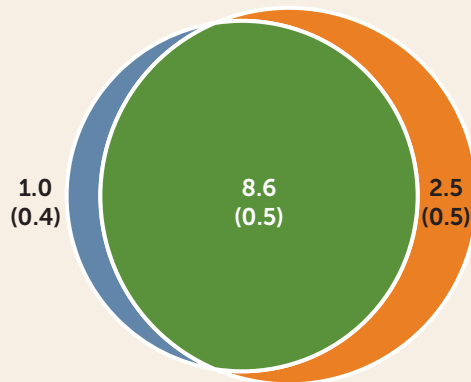

$r_g=0.17$

B. Schizophrenia and BMI

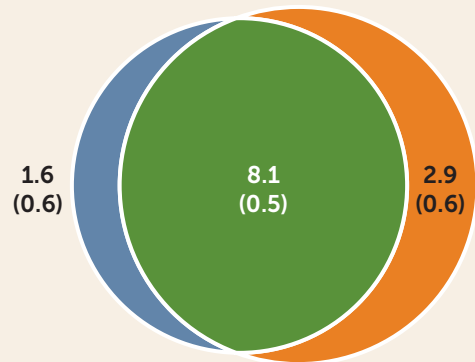

$r_g=-0.13$

Rethinking the First Episode of Schizophrenia

Inequalities in the Incidence of Psychotic Disorders  
Among Racial and Ethnic Groups

Characterizing the Shared Genetic Underpinnings of  
Schizophrenia and Cardiovascular Disease Risk Factors

A Functional Connectome-Based Neural Signature for  
Individualized Prediction of Antipsychotic Response  
in First-Episode Psychosis
